# Supplementary material
Source: Springer Nature journal article supplement (https://www.springermedizin.de/resource/supplementary/13054_2010_8801_MOESM1_ESM.pdf/9732604)
Supplement: MOESM1 [file 9732604]

Patients assessed for eligibility (n =80)

Excluded (n=10)  
Refused to Participate (n=6)  
Not Meeting Inclusion criteria (n=4)  
(Expected duration <1h)

70 Randomized

36 Randomized to restrictive fluid-GDT group  
36 Received Intervention as randomized

34 Randomized to conservative fluid-GDT group  
34 Received Intervention as randomized

Lost to follow-up (n=0)

Lost to follow-up (n=0)

Included in the primary analysis (n=36)

Included in the primary analysis (n=34)
